# Supplementary material for: SNVPhyl: a single nucleotide variant phylogenomics pipeline for microbial genomic epidemiology
Source: PubMed Central journal article supplement (PMC5628696; doi:10.1099/mgen.0.000116), 2017-06-08
Supplement: mgen-3-116-s001.pdf [file mgen-3-116-s001.pdf]

# 1 **Supplementary Materials/Methods**

## 2 **SNVPhyl Parameters**

3 Unless otherwise specified, SNVPhyl analyses for this study were run using the SNVPhyl workflow  
4 version 1.0, with paired-end sequence reads, and with parameters:

- 5 • Variant quality parameters
  - 6 ○ Minimum coverage = 10X
  - 7 ○ Relative SNV abundance = 0.75
  - 8 ○ Minimum mean mapping quality = 30
- 9 • SNV density filtering
  - 10 ○ Window size = 20
  - 11 ○ SNV threshold = 2
- 12 • Repeat identification
  - 13 ○ Minimum length = 150
  - 14 ○ Minimum percent identity = 90%

15 All other parameters were left at the default settings as recorded in the SNVPhyl Galaxy workflow.

## 16 **Supplementary Figures and Tables**

17 Figure S1 was constructed using the phylogenetic trees produced in the “SNV density filtering  
18 evaluation” section of the main manuscript. The tree produced from the “truth” set of SNVs  
19 identified using Gubbins is used as a reference tree and is annotated as “Original alignment” in the  
20 figure. This reference tree is compared to all other phylogenetic trees from each SNV-density  
21 filtering scenario. The comparisons were made using the phytools [34] package in R.

22 Figure S2 was constructed using the phylogenetic trees produced in the “Parameter optimization”  
23 section of the manuscript. The phylogenetic trees were evaluated for concordance with the  
24 epidemiological data according to the conditions: 1) all outbreak isolates group monophyletically,  
25 and 2) the maximum SNV distance between any two isolates within an outbreak clade must be less  
26 than 5 SNVs. These conditions were tested and the figure constructed using the APE [37] package  
27 within R.

28 Table S1 was constructed from previously published strain and accession identifiers [32]. These  
29 were mapped to sequencing run accession identifiers using SRAdB [35].

30 Table S2 was constructed using information obtained from a previous study [36] along with  
31 information from the project SRP067504 under the NCBI Sequence Read Archive.

32 Table S3 was constructed using the SNVs identified by SNVPhyl from the simulated dataset. The copy  
33 numbers covering each position were determined by aligning each variant genome to the reference

34 genome using the MUMmer [25] software package. In particular, the command “show-snps” was  
35 used to extract the number of alignments, and so copies, covering each position.

36

---

## 37 **Supplementary Figures and Tables**

38 **Figure S1.**

39 **Figure S2.**

40 **Table S1.**

41 Separate file **Table\_S1.xlsx**

42 **Table S2.**

43 Separate file **Table\_S2.xlsx**

44 **Table S3.**

45 Separate file **Table\_S3.xlsx**

46

Figure S1

(a) No filter

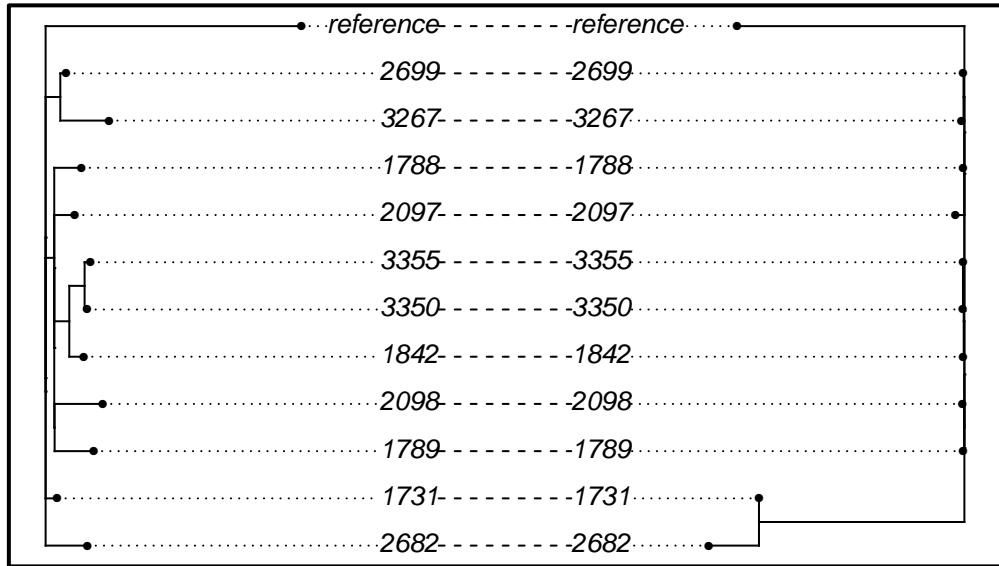

Original alignment

SNVPhyl alignment

(b) 2 SNVs in 20 bp

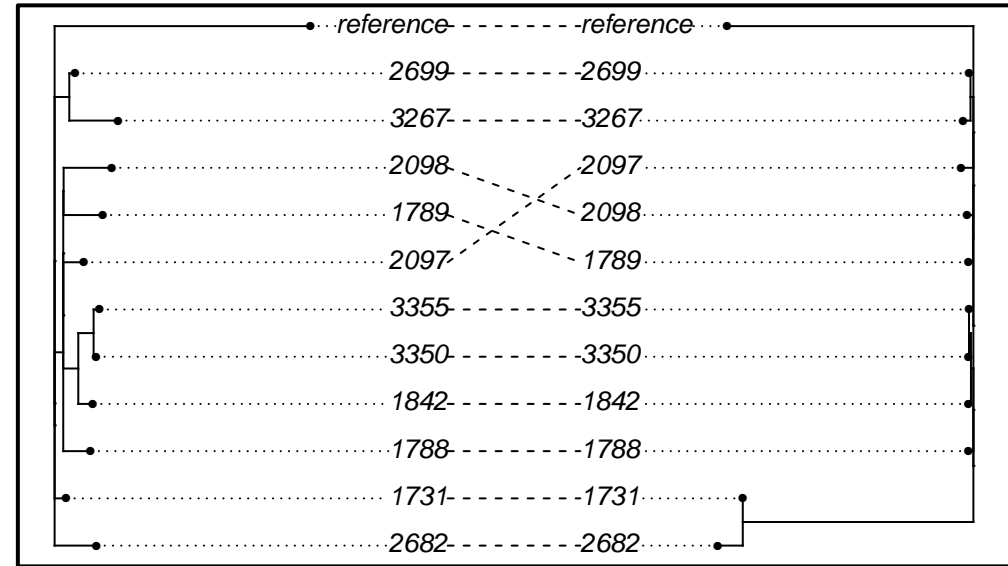

Original alignment

SNVPhyl alignment

(c) 2 SNVs in 100 bp

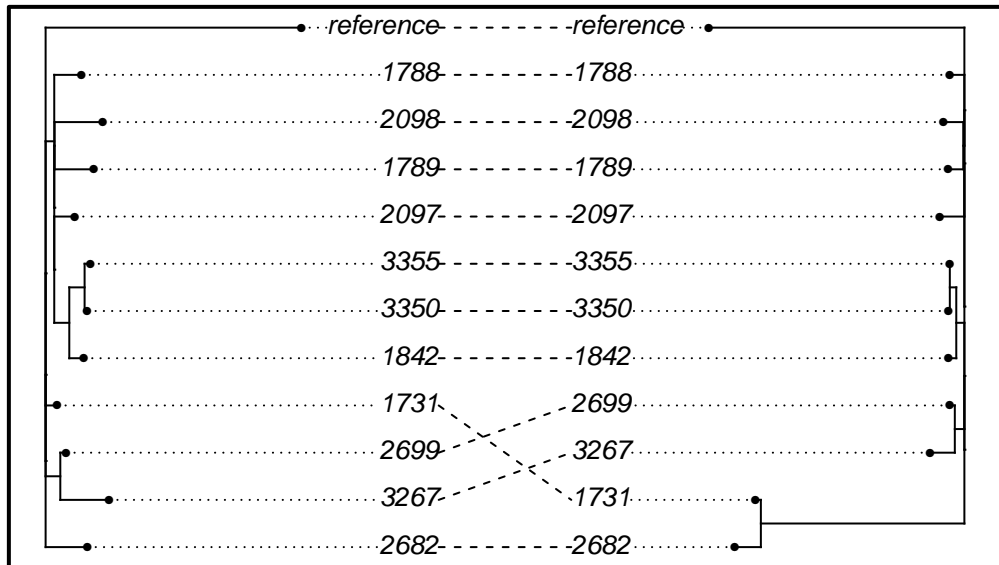

Original alignment

SNVPhyl alignment

(d) 2 SNVs in 500 bp

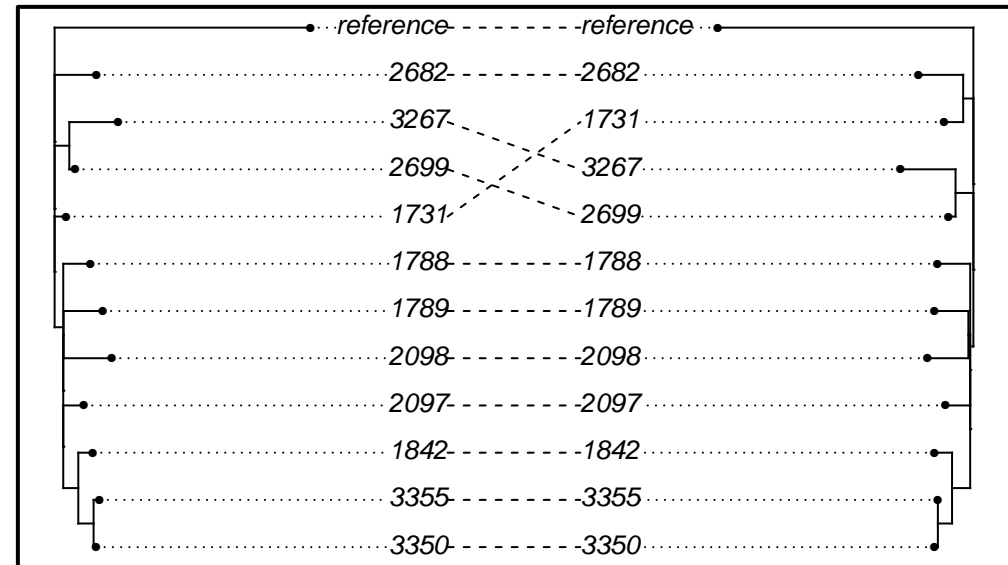

Original alignment

SNVPhyl alignment

Figure S1

(e) 2 SNVs in 1000 bp

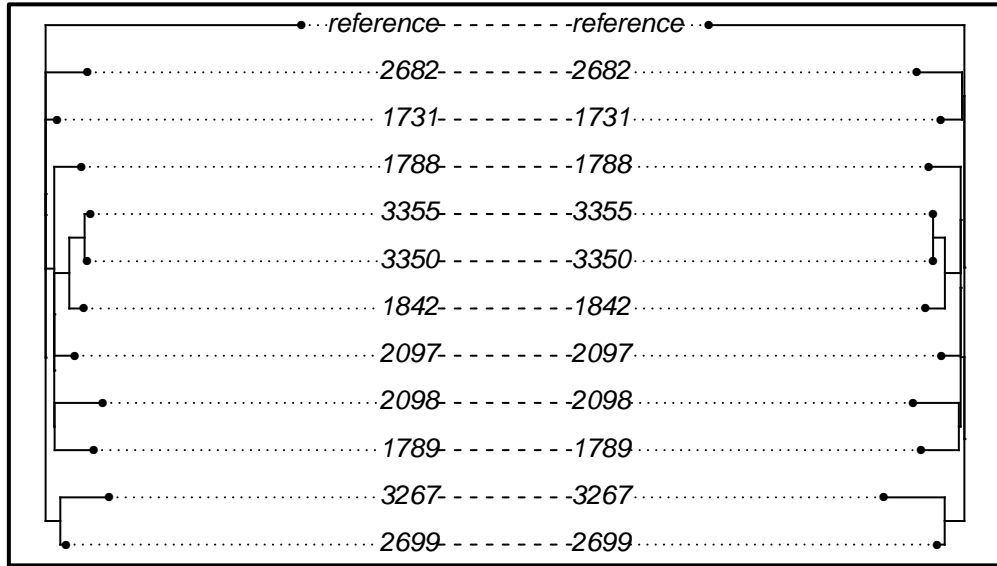

(f) 2 SNVs in 2000 bp

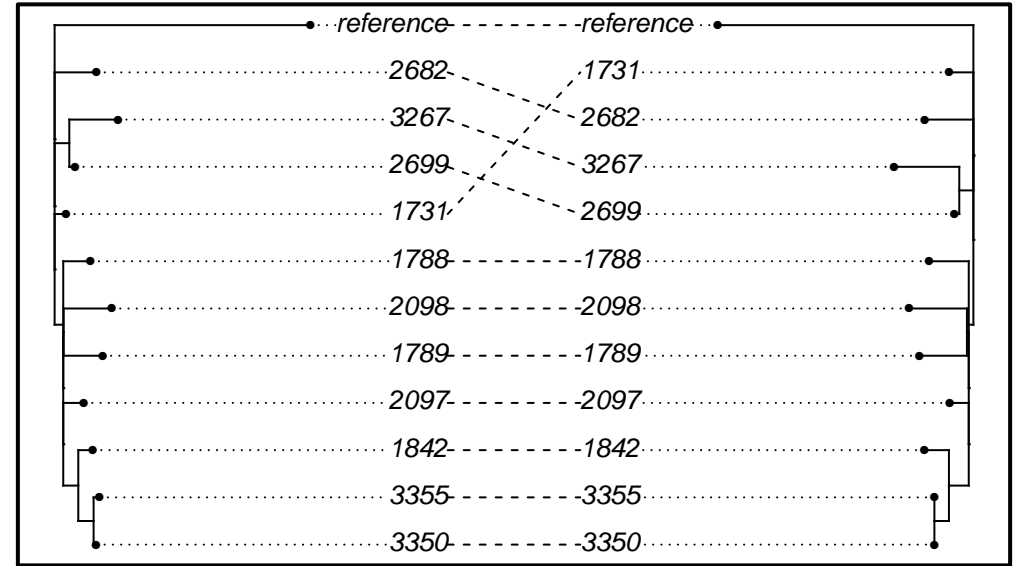

(g) SNVPhyl then Gubbins

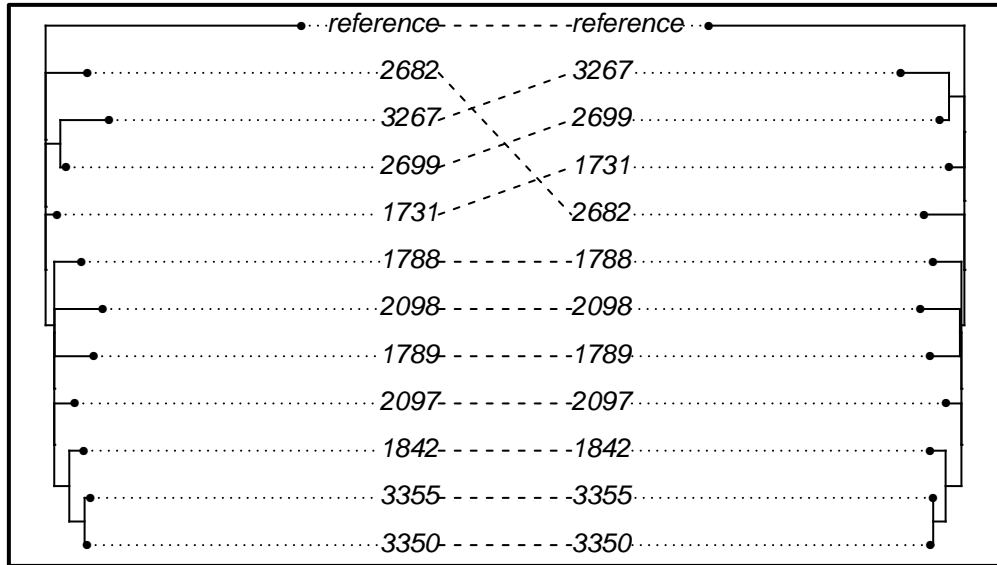

Original alignment

SNVPhyl alignment

Original alignment

SNVPhyl alignment

Original alignment

SNVPhyl alignment

Figure S2  
(a) Minimum Coverage

Minimum Coverage 5

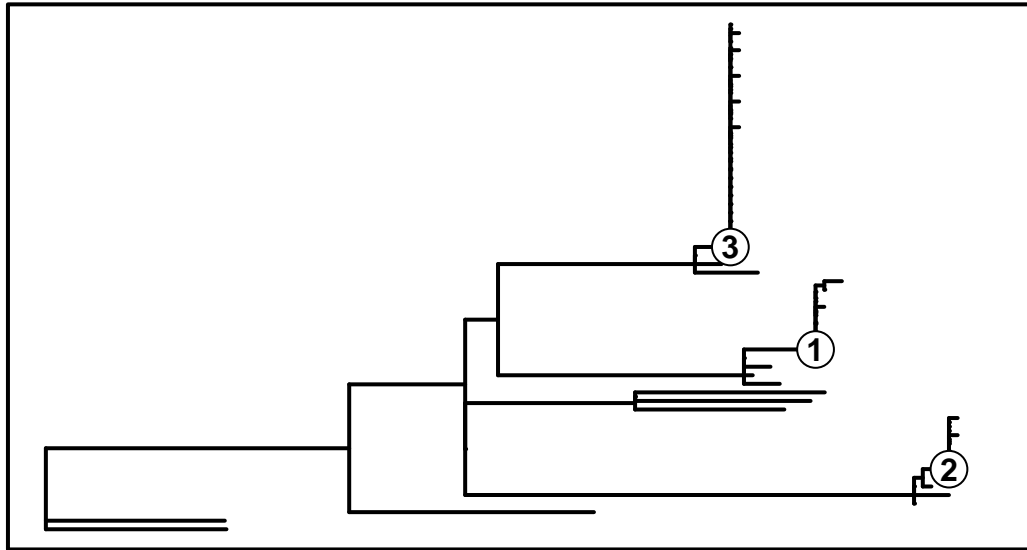

317 SNVs

95% core

Minimum Coverage 10

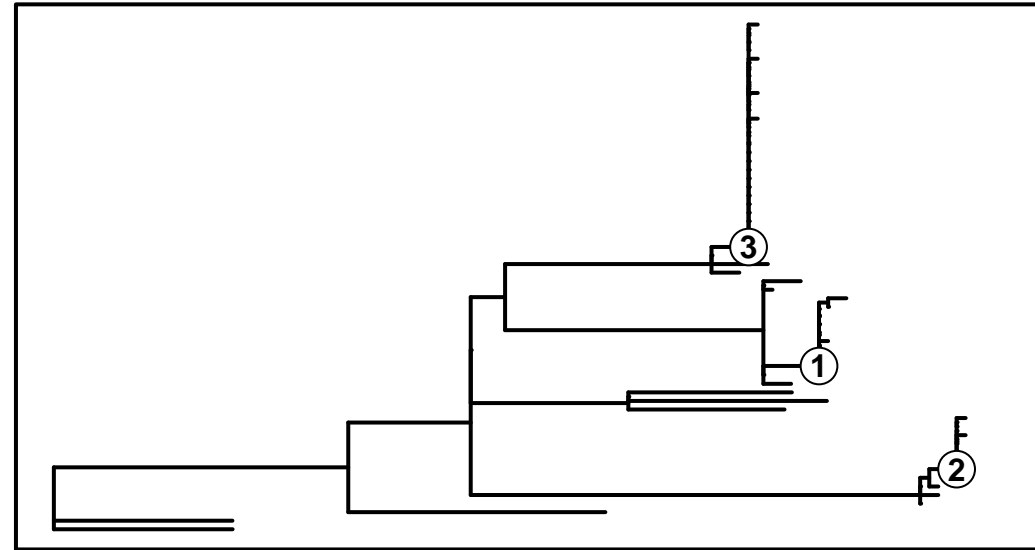

301 SNVs

92% core

Minimum Coverage 15

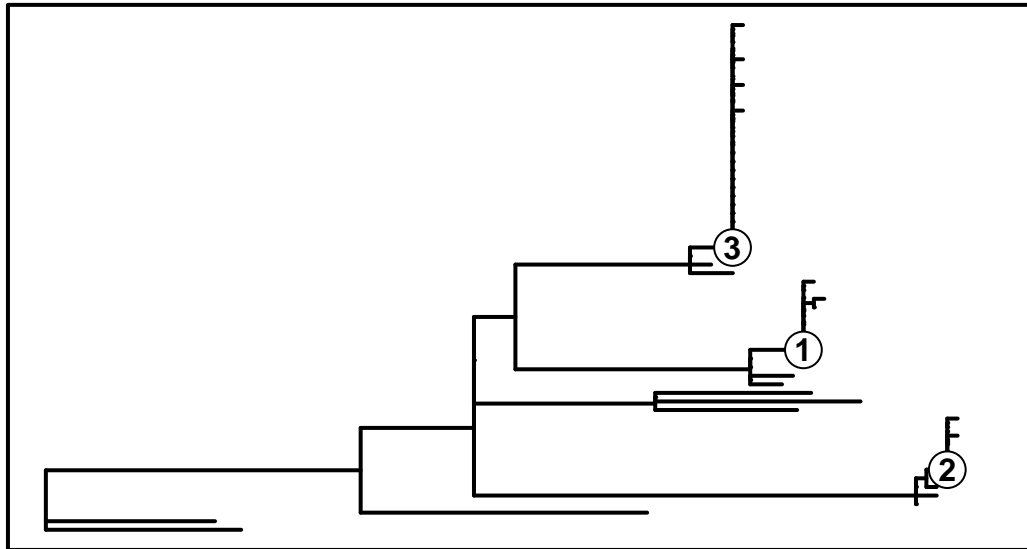

262 SNVs

81% core

Minimum Coverage 20

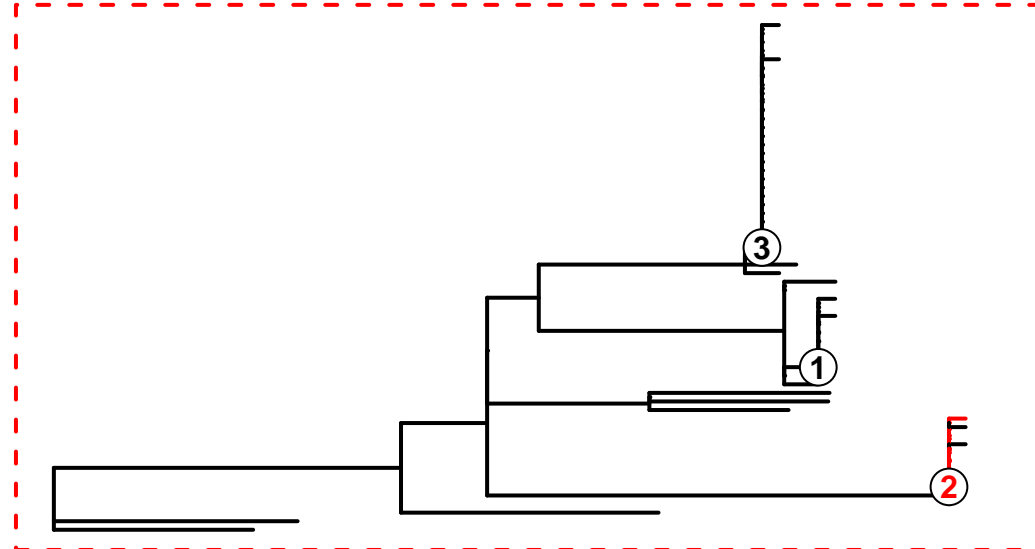

165 SNVs

54% core

Failed: Not monophyletic

Figure S2  
(b) Subsample coverage level

Subsample coverage 10

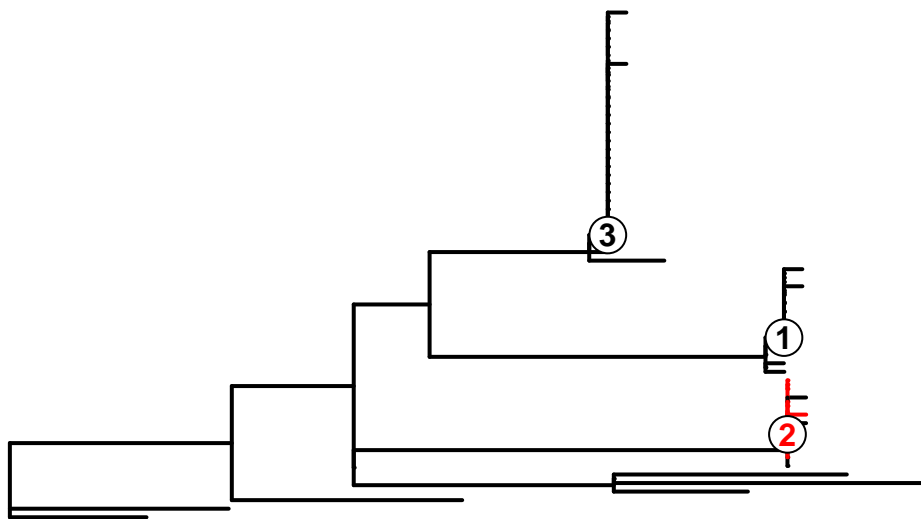

155 SNVs

Failed: Not monophyletic

47% core

Subsample coverage 15

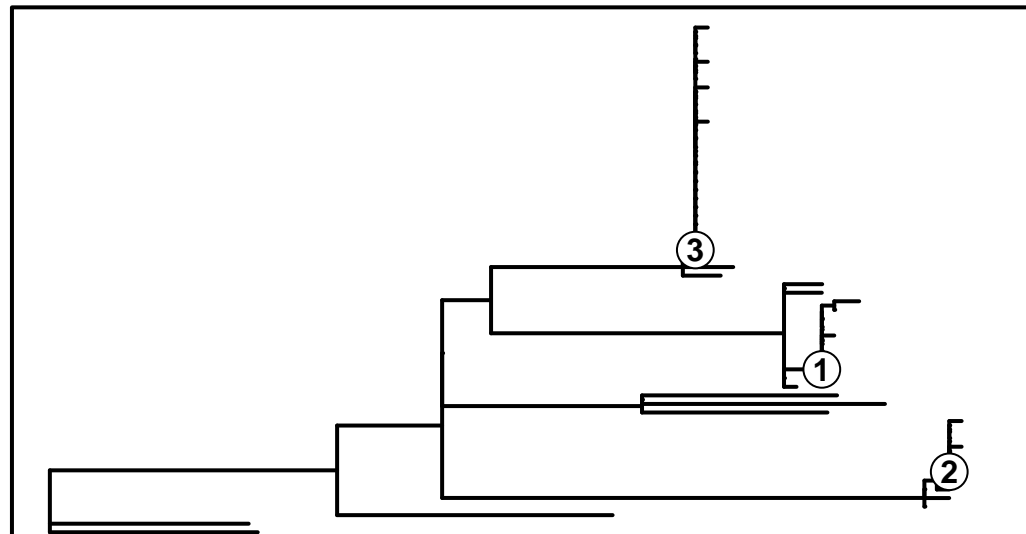

242 SNVs

76% core

Subsample coverage 20

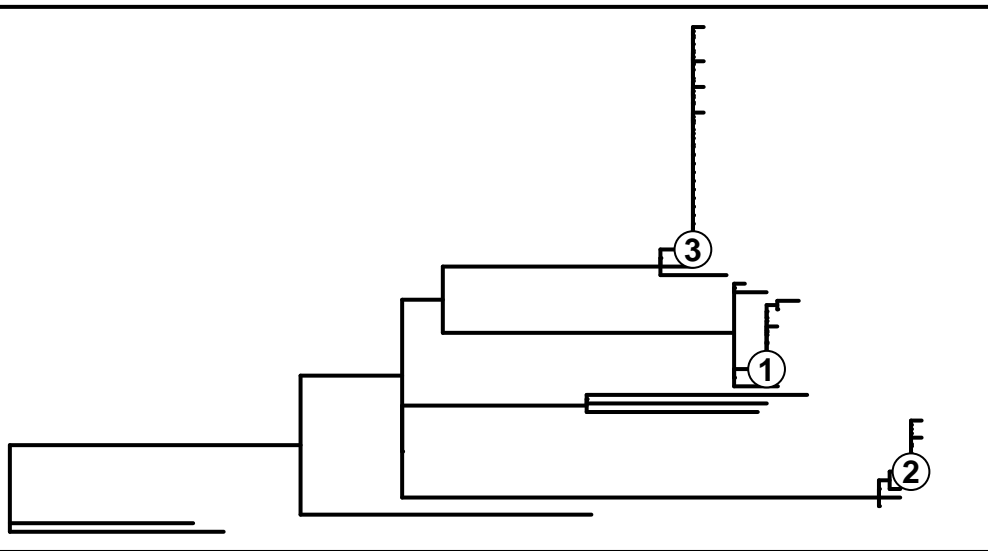

276 SNVs

88% core

Subsample coverage 30

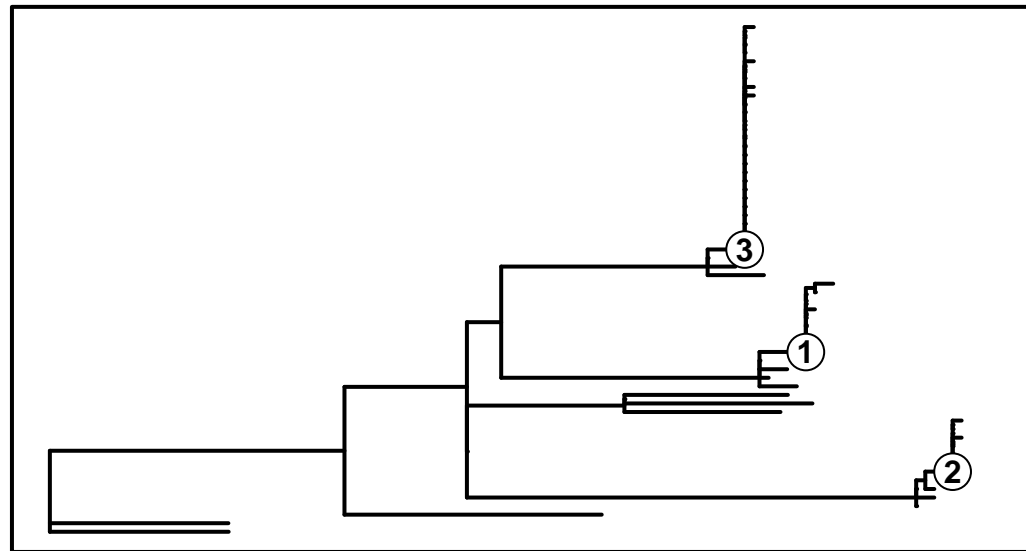

299 SNVs

92% core

Figure S2  
(c) Relative SNV Abundance

Relative SNV Abundance 0.25

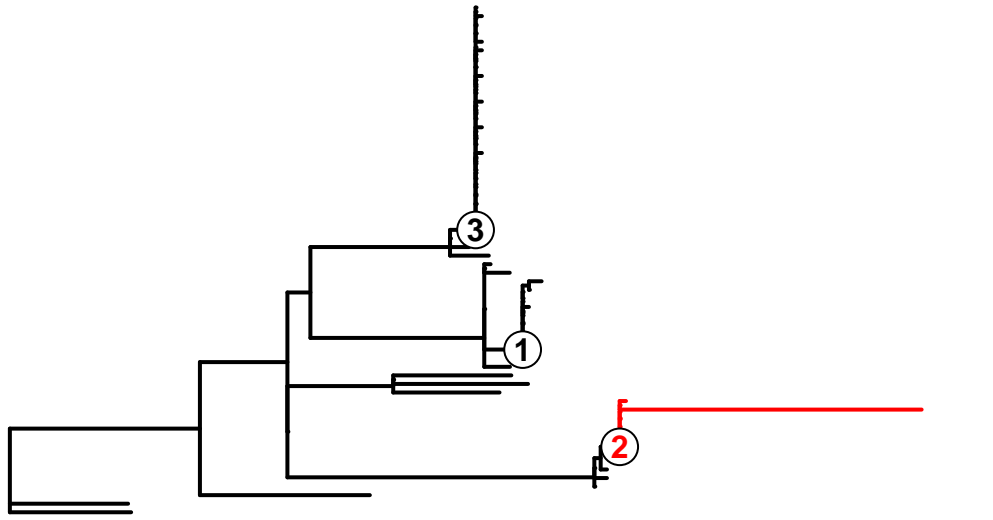

351 SNVs

Failed: Maximum distance of 44 SNVs not within 5 SNVs

92% core

Relative SNV Abundance 0.5

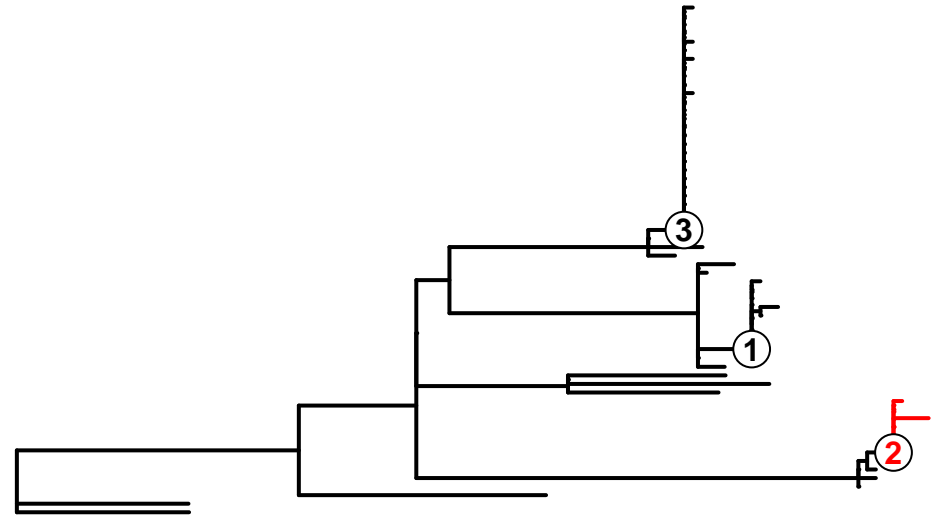

307 SNVs

Failed: Maximum distance of 5 SNVs not within 5 SNVs

92% core

Relative SNV Abundance 0.75

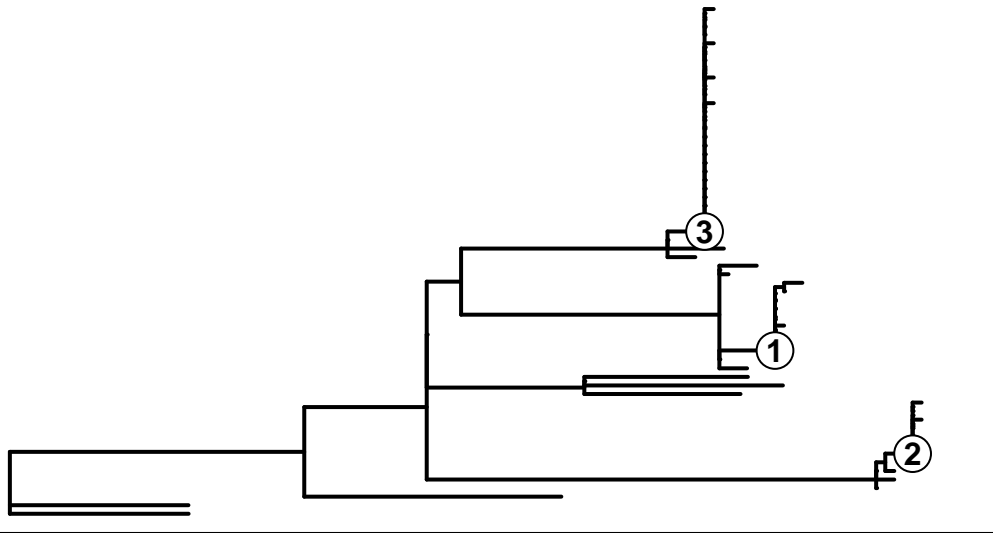

301 SNVs

92% core

Relative SNV Abundance 0.9

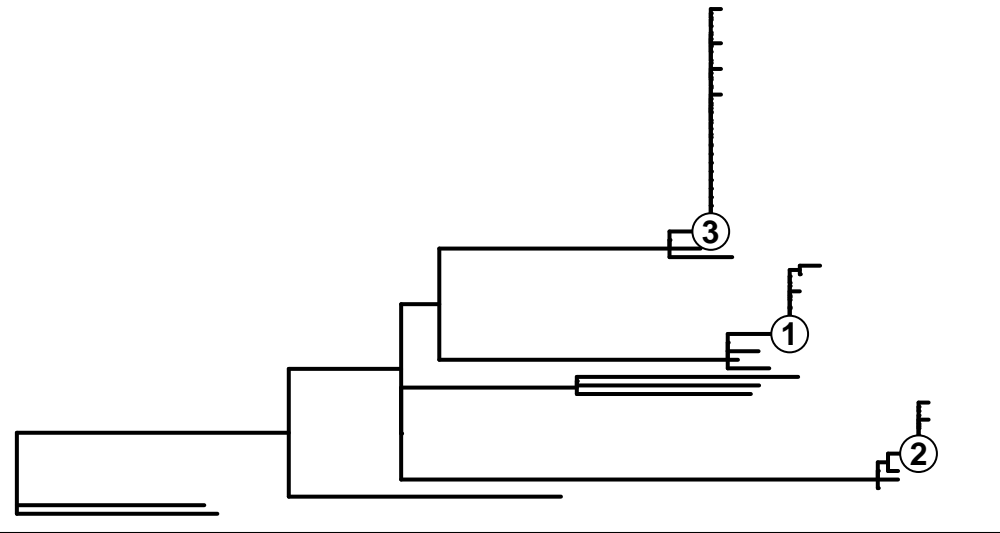

291 SNVs

92% core

Figure S2  
(d) Contamination

5% contaminated

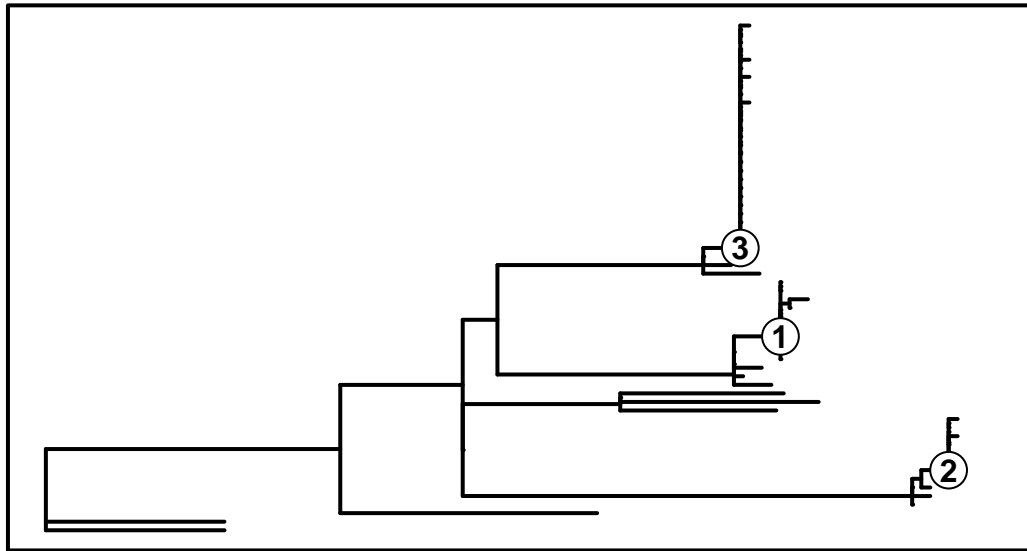

298 SNVs

92% core

10% contaminated

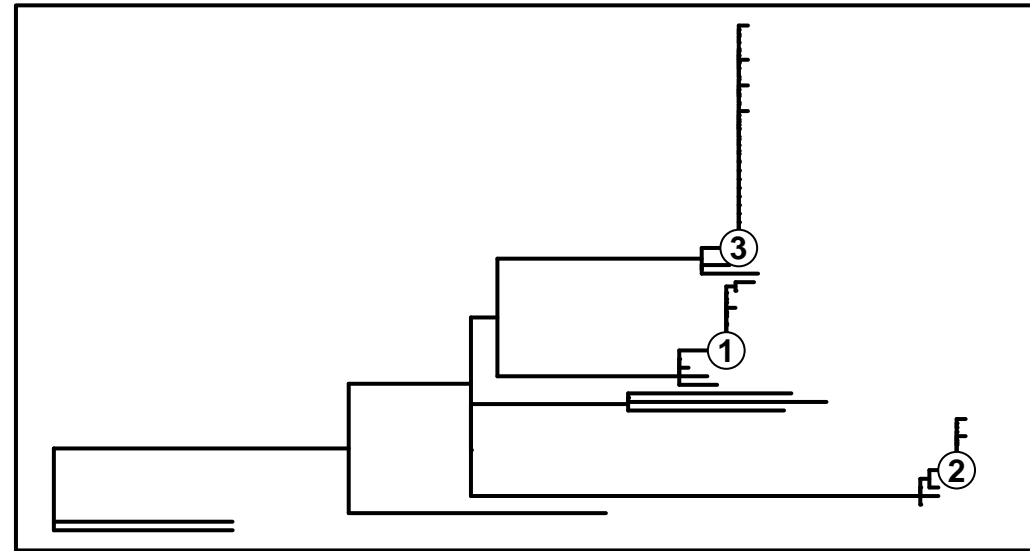

292 SNVs

92% core

20% contaminated

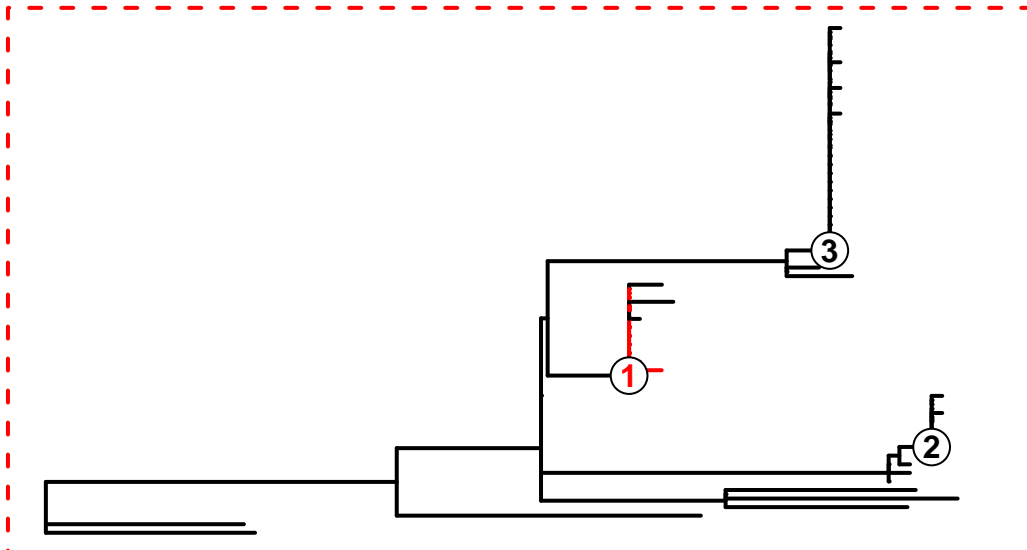

260 SNVs

92% core

Failed: Not monophyletic

30% contaminated

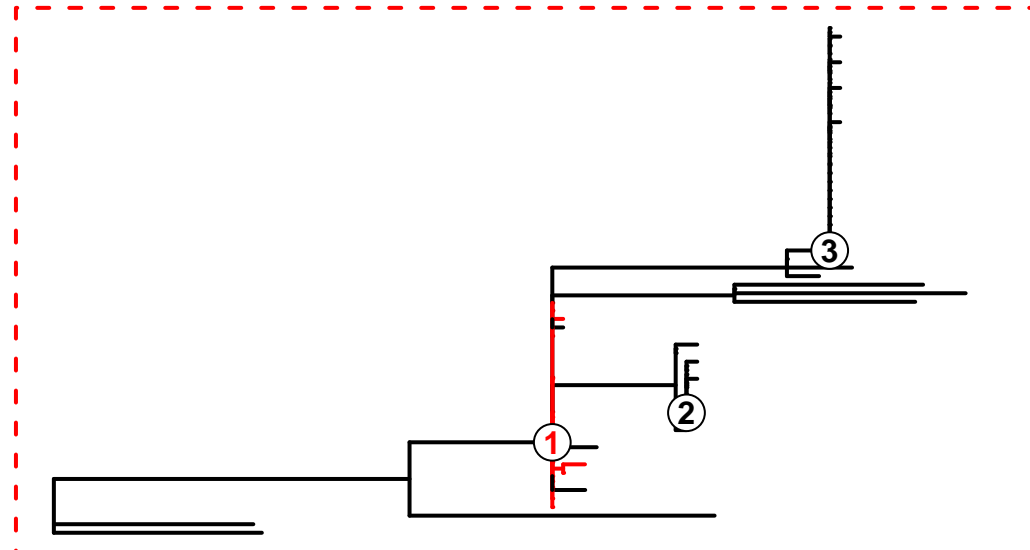

231 SNVs

92% core

Failed: Not monophyletic
